# Supplementary material for: Comparative Evaluation of the Nutrients, Phytochemicals, and Antioxidant Activity of Two Hempseed Oils and Their Byproducts after Cold Pressing
Source: MDPI journal article supplement (doi:10.3390/molecules27113431), 2022-05-26
Supplement: s1 [file s1]

## Supplementary material captions

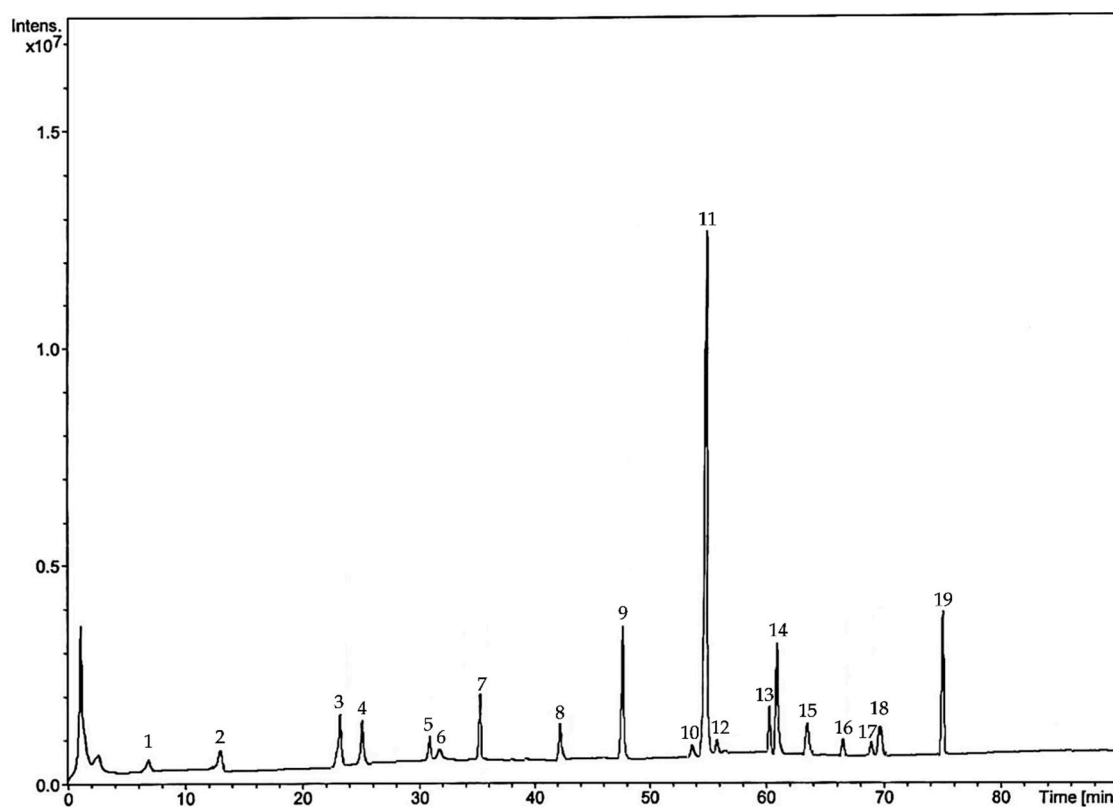

**Figure S1.** Total ion current chromatogram of USO 31 hempseed oil (HSO). Peak numbers refer to polyphenols reported in Table 3.

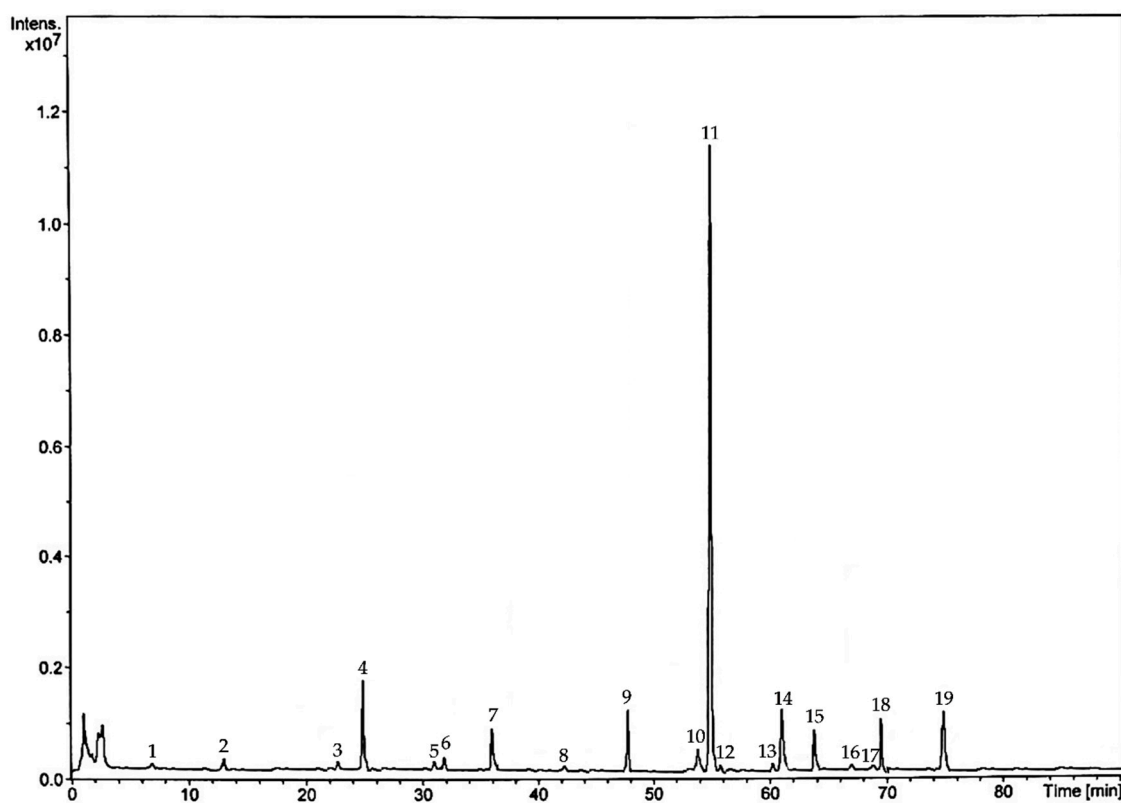

**Figure S2.** Total ion current chromatogram of Futura 75 hempseed oil (HSO). Peak numbers refer to polyphenols reported in Table 3.

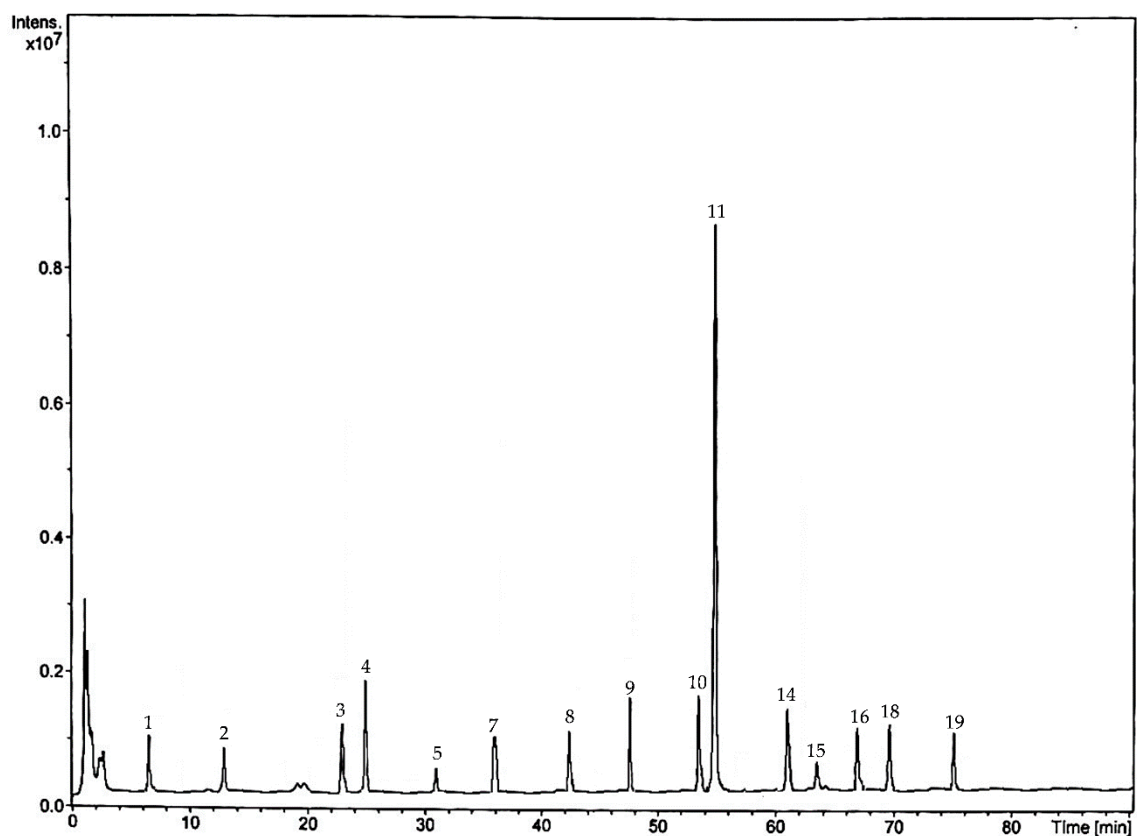

**Figure S3.** Total ion current chromatogram of USO 31 hempseed meal (HSM). Peak numbers refer to polyphenols reported in Table 3.

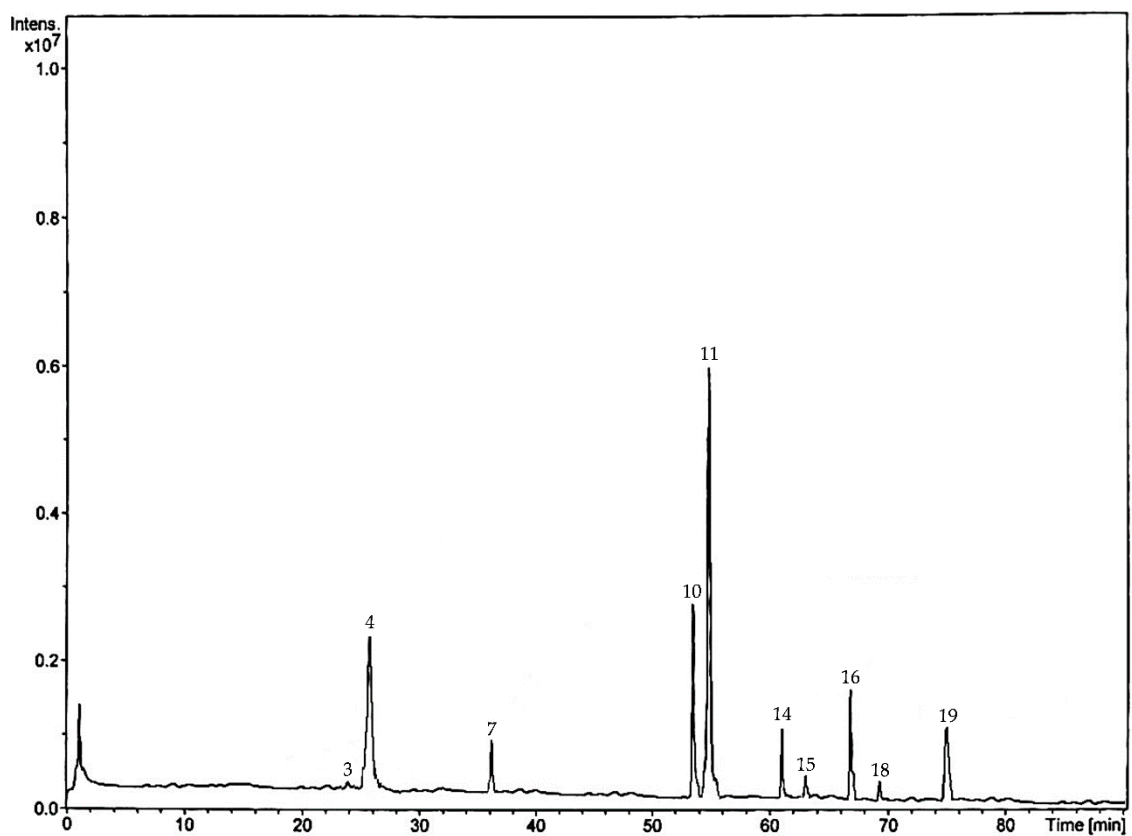

**Figure S4.** Total ion current chromatogram of Futura 75 hempseed meal (HSM). Peak numbers refer to polyphenols reported in Table 3.
